# Supplementary material for: Construction of a reversible-cycling bifunctional electrocatalyst CoP2@Co(CO3)0.5OH/Cu/NF with Mott–Schottky structure for overall water splitting
Source: Royal Society of Chemistry journal article supplement (doi:10.1039/d4qi01127a), 2024-01-01
Supplement: d4qi01127a1.pdf [file d4qi01127a1.pdf]

## Supporting Information

### Construction of Reversible-cycling Bifunctional Electrocatalyst CoP<sub>2</sub>@Co(CO<sub>3</sub>)<sub>0.5</sub>OH/Cu/NF with Mott-Schottky structure for Overall Water Splitting

Xinyuan Liao <sup>a†</sup>, Xiaomin Lang <sup>a†</sup>, Ting Zhang <sup>a</sup>, Chunmei Li <sup>a</sup>, Jian Zou <sup>c</sup>, Qing Li <sup>a</sup>,  
Weihua Hu <sup>a</sup>, and Hua Lin <sup>a,b\*</sup>

- a. School of Materials and Energy, Southwest University, Chongqing 400715, P. R. China.*
- b. Yibin Academy of Southwest University, Yibin, 64400, P. R. China.*
- c. School of Chemistry and Chemical Engineering, Southwest University, Chongqing 400715, P. R. China.*

† These authors contributed equally to this work.

\*Corresponding author: lh2004@swu.edu.cn

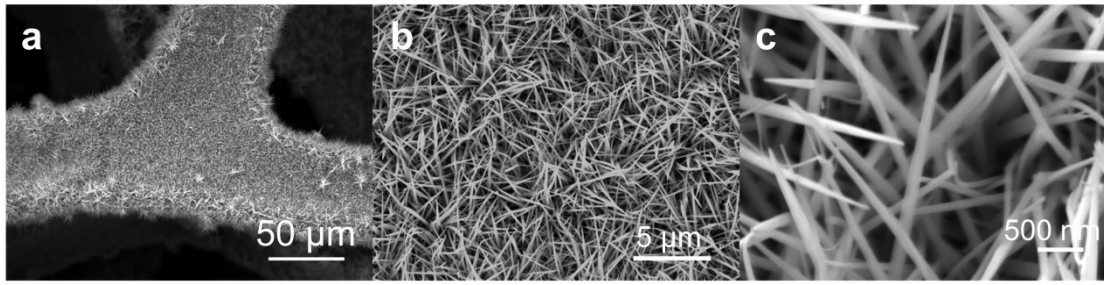

**Figure S1.** (a-c) The SEM images of  $\text{Co}(\text{CO}_3)_{0.5}\text{OH}/\text{Cu}/\text{NF}$  at different magnifications (Corresponding to the magnification of  $\text{CoP}_2@\text{Co}(\text{CO}_3)_{0.5}\text{OH}/\text{Cu}/\text{NF}$ ).

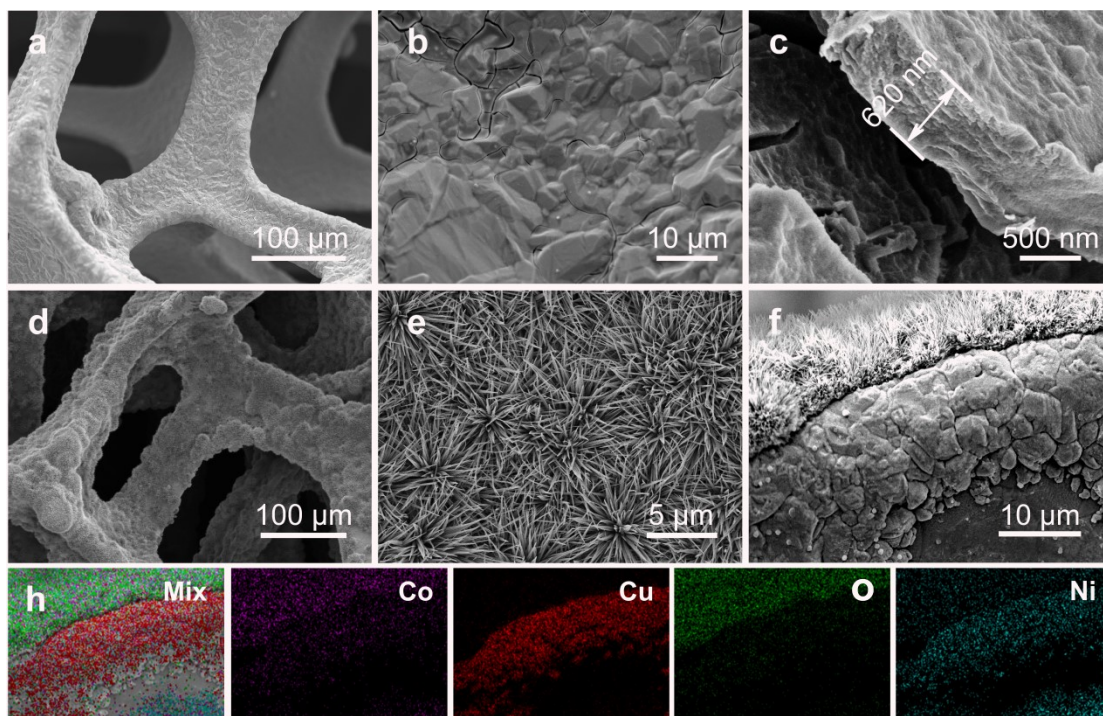

**Figure S2.** (a-b) SEM images of Cu/NF; (c) Thickness of the copper layer on the surface of Cu/NF; SEM images of  $\text{Co}(\text{CO}_3)_{0.5}\text{OH}/\text{Cu}/\text{NF}$  (d-e) and  $\text{Co}(\text{CO}_3)_{0.5}\text{OH}/\text{Cu}/\text{NF}$  surface etching sites, and the corresponding EDS plots (f-h).

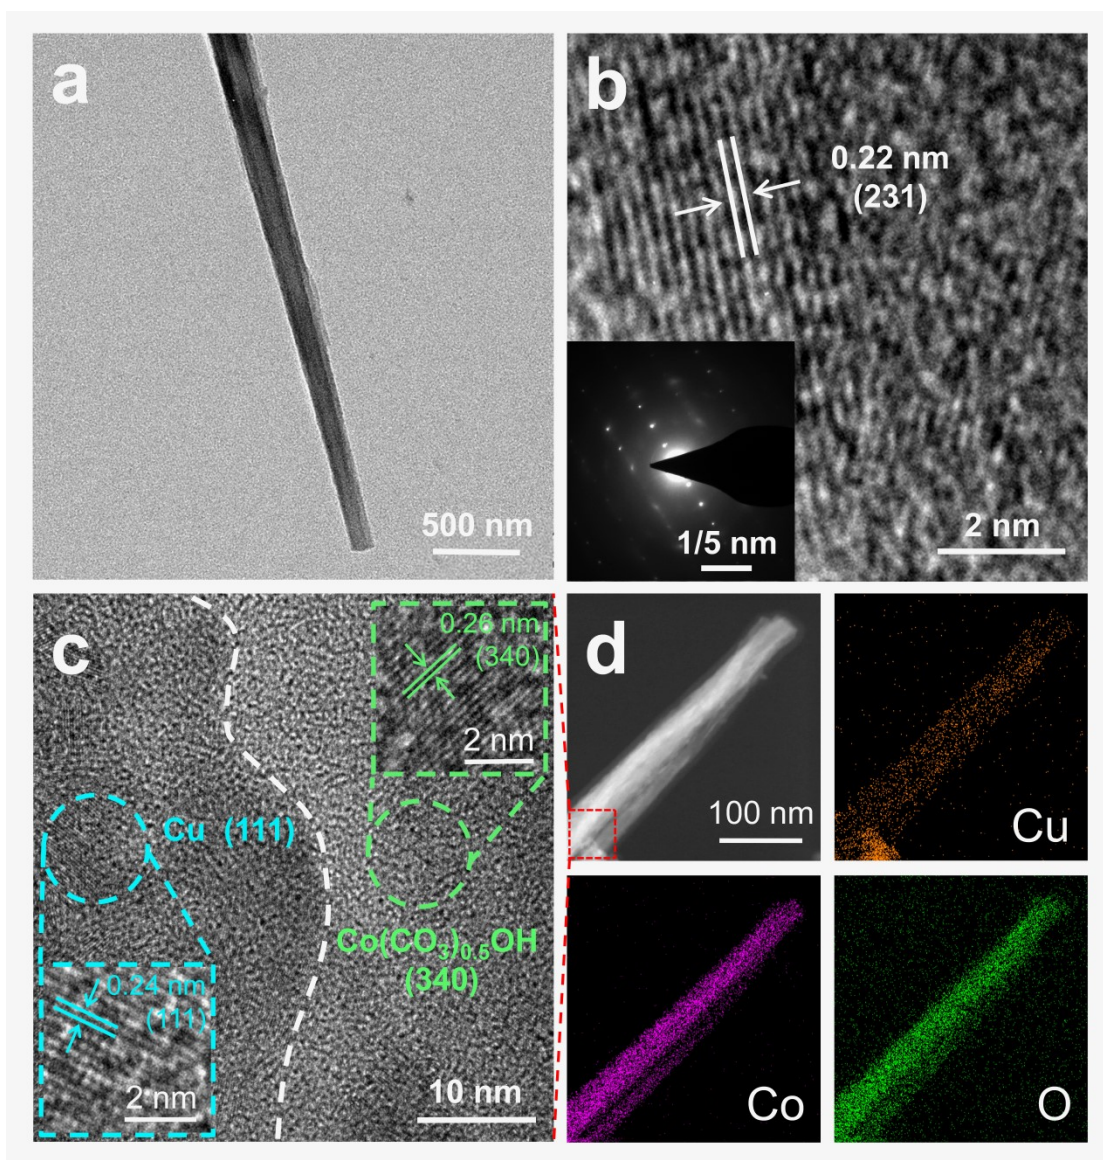

**Figure S3.** (a) TEM image of  $\text{Co}(\text{CO}_3)_{0.5}\text{OH}$  nanowire; (b) HRTEM image of  $\text{Co}(\text{CO}_3)_{0.5}\text{OH}$  nanowire (The inset is an electron diffraction pattern); (c) HRTEM image; (d) Distribution of elements at  $\text{Co}(\text{CO}_3)_{0.5}\text{OH}$  and Cu heterojunctions.

As shown in Fig.S3a,  $\text{Co}(\text{CO}_3)_{0.5}\text{OH}$  nanowires can be more clearly observed in the transmission electron microscope of  $\text{Co}(\text{CO}_3)_{0.5}\text{OH}/\text{Cu}/\text{NF}$ . As shown in Figure 3b, the lattice spacing on the nanowire substrate is  $d \approx 0.22$  nm, corresponding to the ( 231 ) crystal plane of  $\text{Co}(\text{CO}_3)_{0.5}\text{OH}$ . The selected area electron diffraction ( SAED ) pattern shows a regular lattice, indicating that the nanowires have good crystallinity. Then the high-resolution TEM analysis is carried out. In Figure 3c, the white dotted line is used as the interface. The  $d \approx 0.24$  nm of the left lattice fringe corresponds to the ( 111 ) crystal

plane of Cu, while the  $d \approx 0.22$  nm of the region on the right side of the white dotted line corresponds to the (231) crystal plane of  $\text{Co}(\text{CO}_3)_{0.5}\text{OH}$ . The left and right sides of the imaginary line correspond to the metal Cu phase and  $\text{Co}(\text{CO}_3)_{0.5}\text{OH}$  phase, respectively, indicating that a heterojunction structure is formed between Cu and  $\text{Co}(\text{CO}_3)_{0.5}\text{OH}$  phases. The energy dispersive X-ray (EDX) element mapping of Figure S3d shows that the Co and O signals are uniformly distributed on the nanowires, while the Cu signal is concentrated on the nanosheets in the lower left corner, which is consistent with the formation of Cu and  $\text{Co}(\text{CO}_3)_{0.5}\text{OH}$  heterojunction.



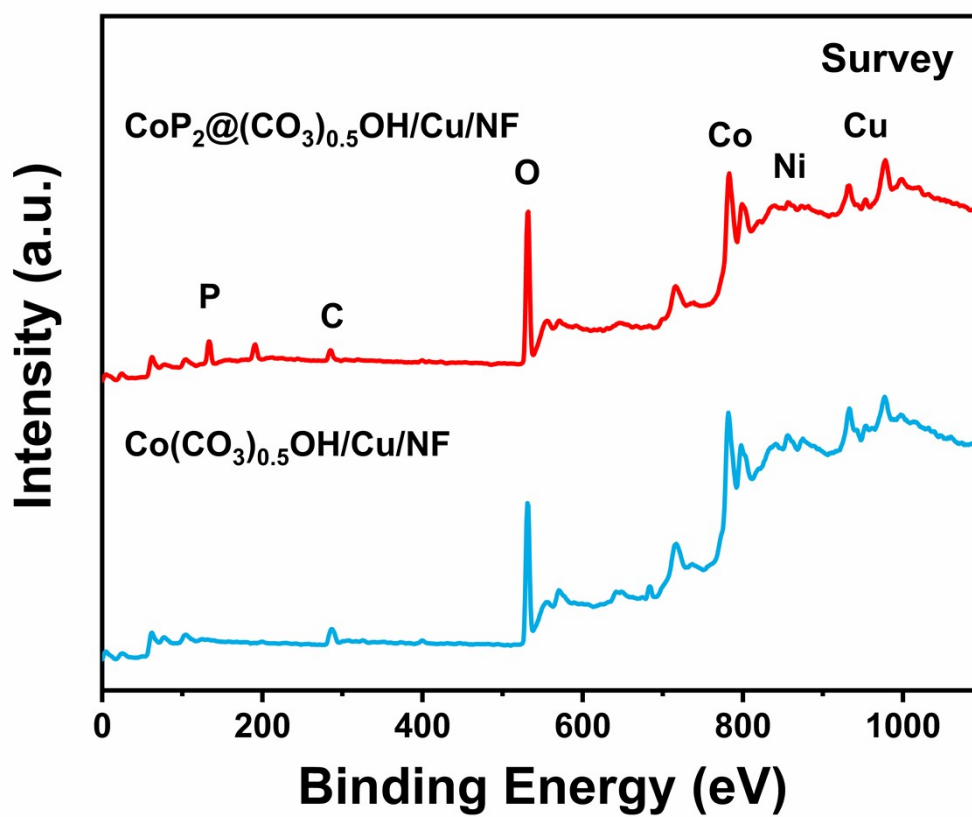

**Figure S4.** Total XPS spectrum of  $\text{CoP}_2@(\text{CO}_3)_{0.5}\text{OH}/\text{Cu}/\text{NF}$  and  $\text{Co}(\text{CO}_3)_{0.5}\text{OH}/\text{Cu}/\text{NF}$ .

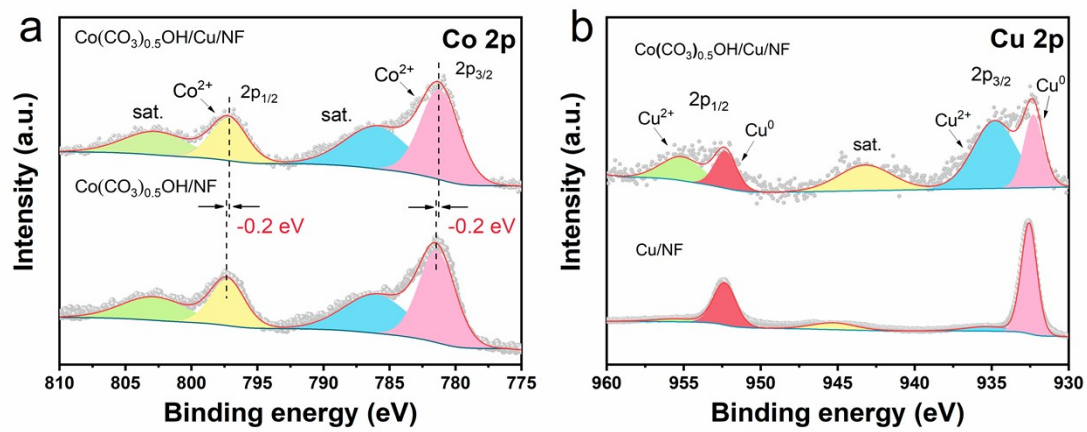

**Figure S5.** XPS spectra of  $\text{Co}(\text{CO}_3)_{0.5}\text{OH}/\text{Cu}/\text{NF}$  (a)Co 2p; (b)Cu 2p.

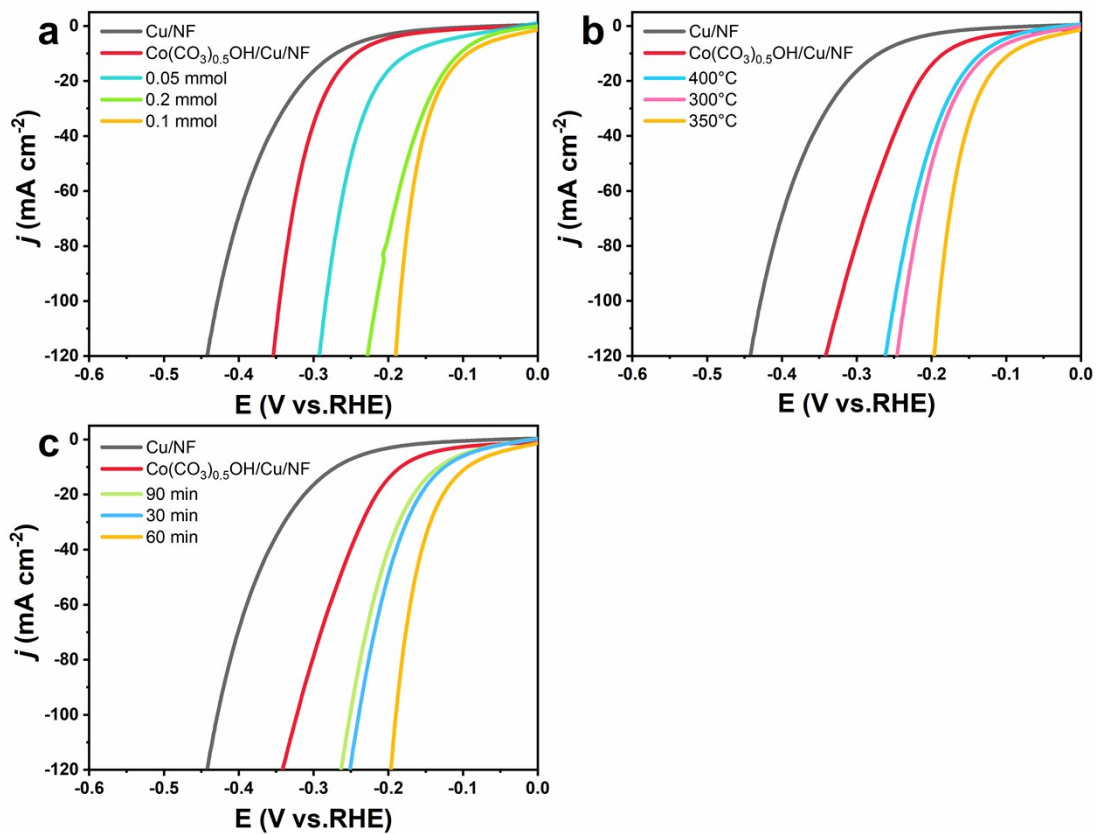

**Figure S6.** Effect of different conditions on HER activity (a) Molar mass of sodium hypophosphite; (b) Phosphating temperatures; (c) Phosphating time.



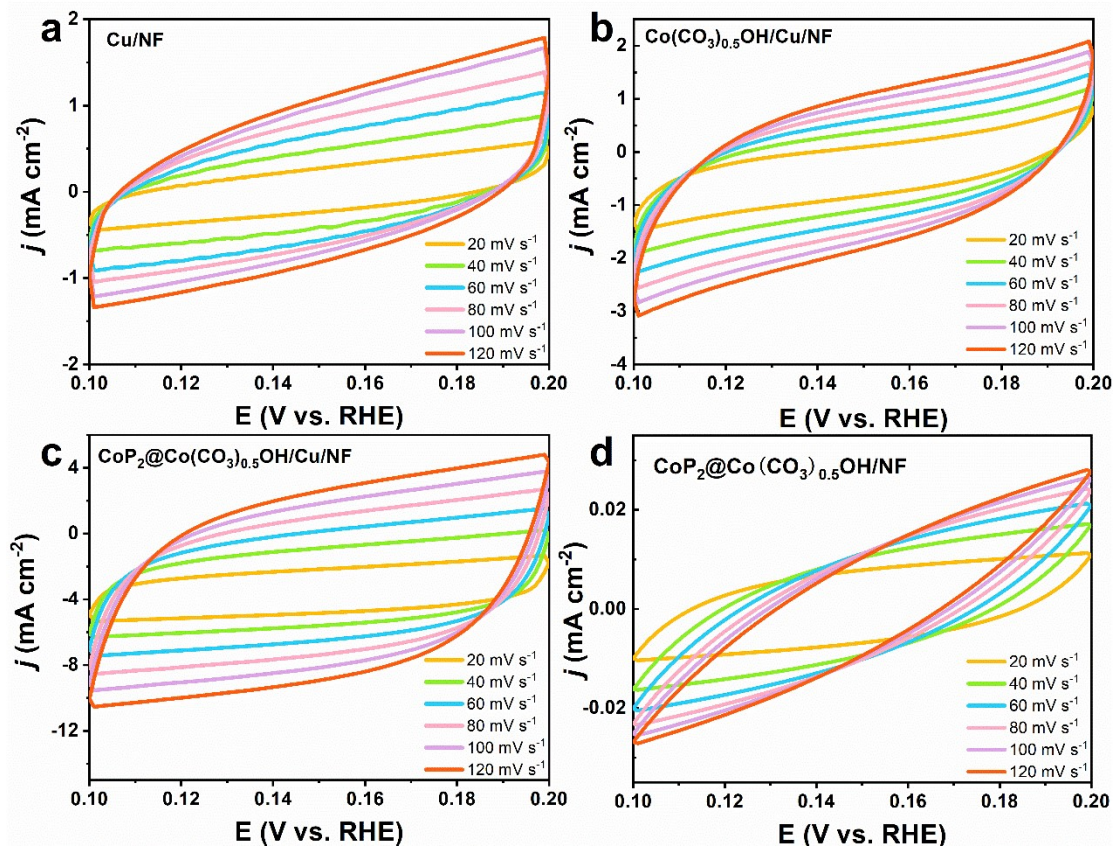

**Figure S7.** CV curves in the region of 0.2-0.3 V for (a) Cu/NF, (b) Co(CO<sub>3</sub>)<sub>0.5</sub>OH/Cu/NF, (c) CoP<sub>2</sub>@Co(CO<sub>3</sub>)<sub>0.5</sub>OH/Cu/NF and (d) CoP<sub>2</sub>@Co(CO<sub>3</sub>)<sub>0.5</sub>OH/NF at various scan rates. (20, 40, 60, 80, 100, and 120 mV s<sup>-1</sup>).

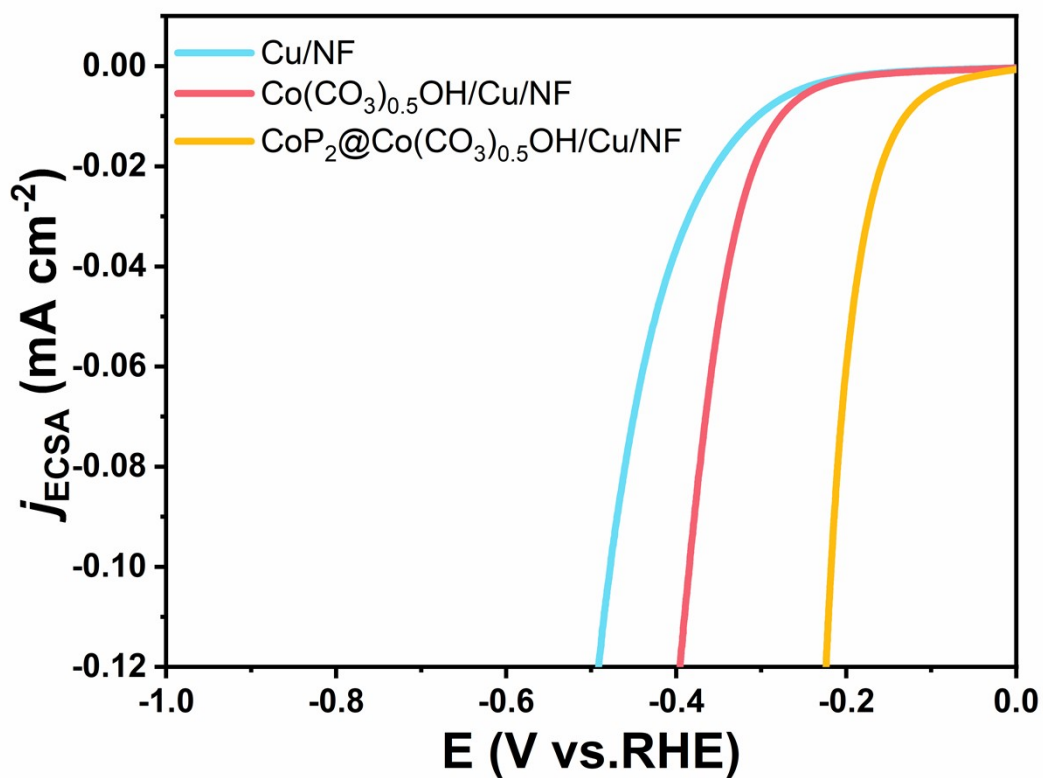

**Figure S8.** ECSA-normalized LSV curves of Cu/NF, Co(CO<sub>3</sub>)<sub>0.5</sub>OH/Cu/NF, and CoP<sub>2</sub>@Co(CO<sub>3</sub>)<sub>0.5</sub>OH/Cu/NF in HER. (The Cdl is converted to ECSA using the specific capacitance value for a flat surface of 0.04 mF cm<sup>-2</sup>).

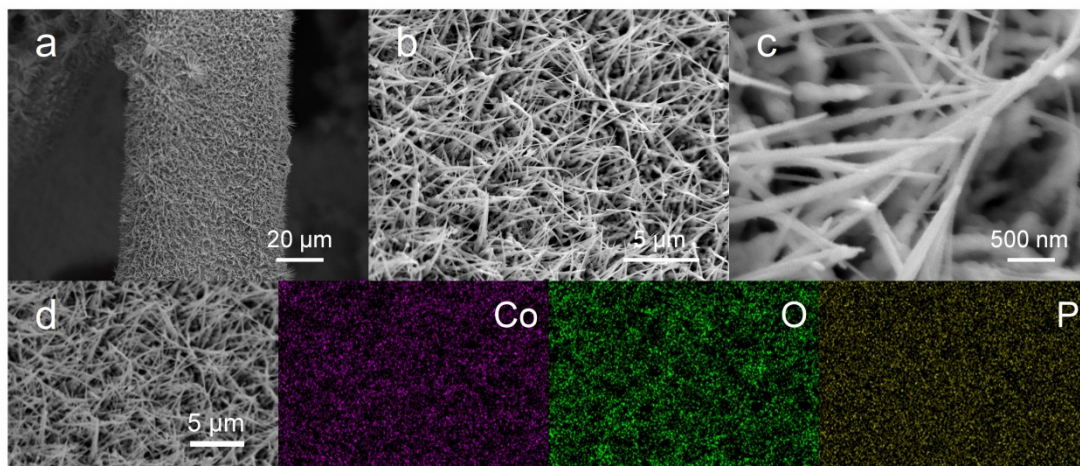

**Figure S9.** The SEM images of  $\text{CoP}_2@\text{Co}(\text{CO}_3)_{0.5}\text{OH}/\text{Cu}/\text{NF}$  after HER

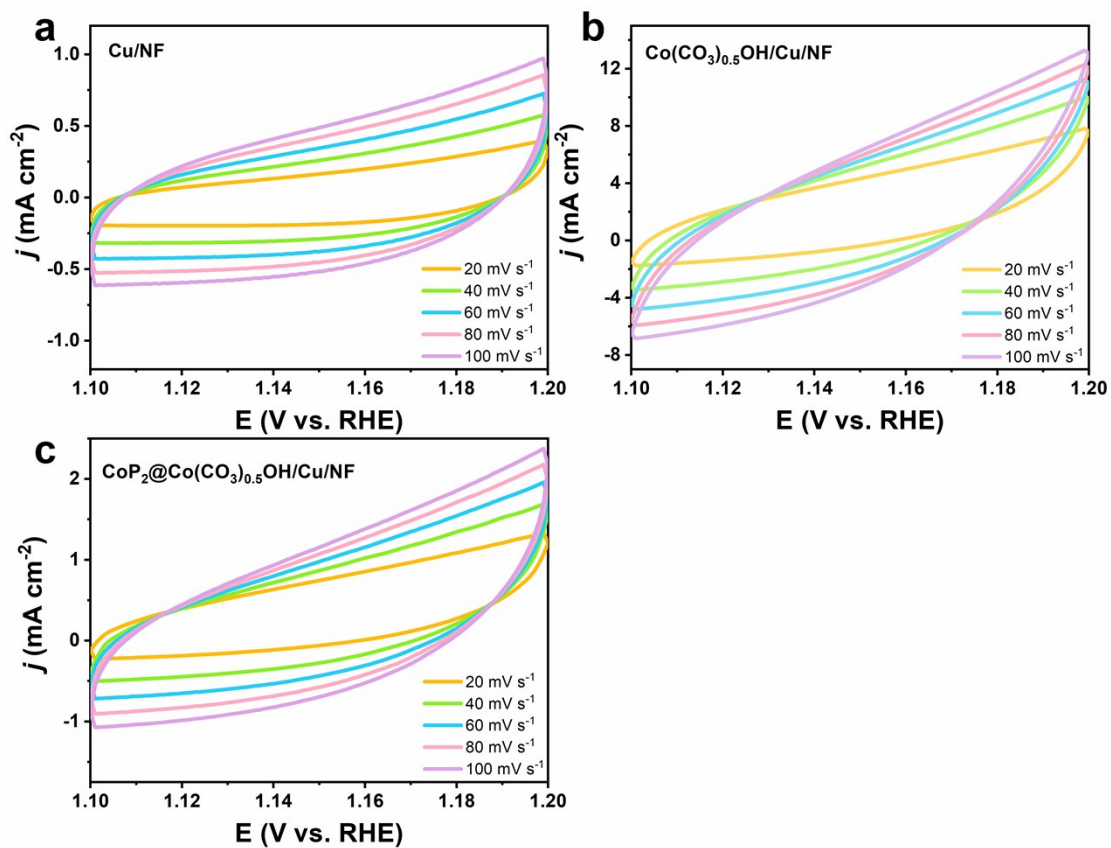

**Figure S10.** CV curves in the region of 1.13-1.23 V for (a) Cu/NF, (b) Co(CO<sub>3</sub>)<sub>0.5</sub>OH/Cu/NF, and (c) CoP<sub>2</sub>@Co(CO<sub>3</sub>)<sub>0.5</sub>OH/Cu/NF at various scan rates. (20, 40, 60, 80, and 100 mV s<sup>-1</sup>).

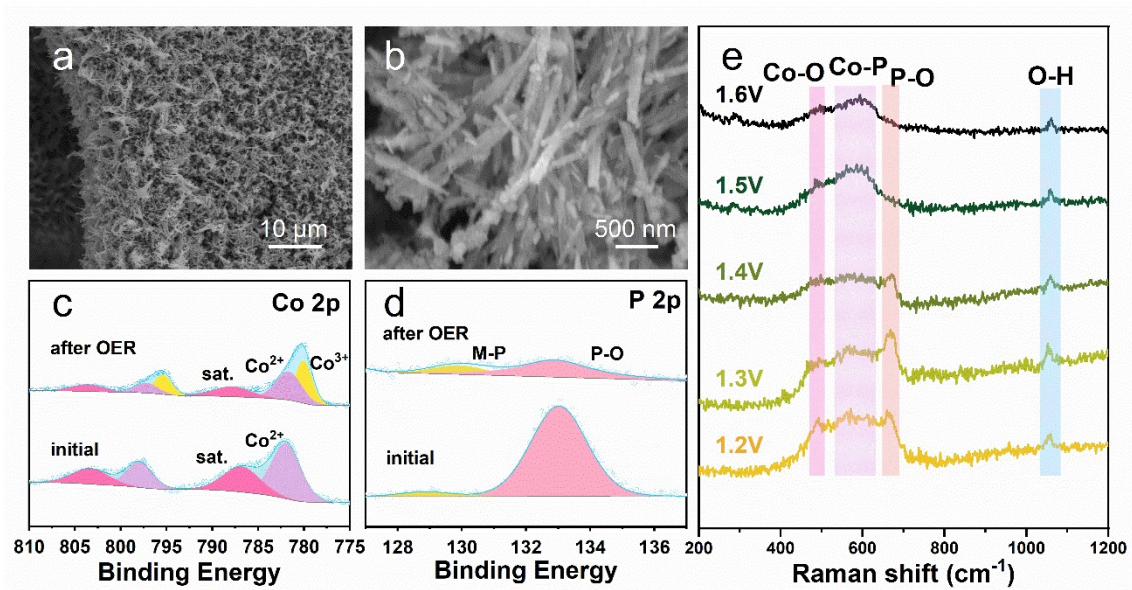

**Figure S11.** (a-b) SEM images and (c-d) XPS spectra of  $\text{CoP}_2@(\text{Co}(\text{CO}_3)_{0.5}\text{OH})/\text{Cu}/\text{NF}$  after the OER, (e) In-situ Raman pattern of the sample during OER process.

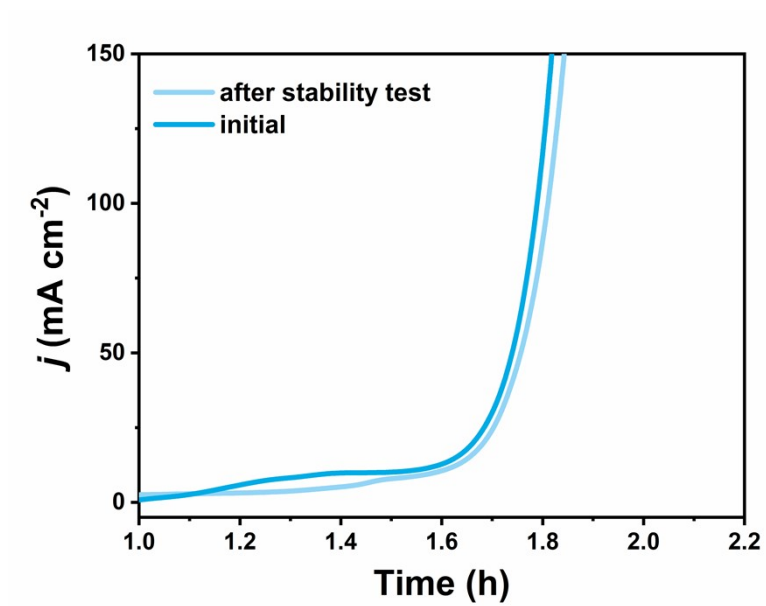

**Figure S12.** The overall water splitting properties of CoP<sub>2</sub>@Co(CO<sub>3</sub>)<sub>0.5</sub>OH/Cu/NF (+, -) before and after 48 h.



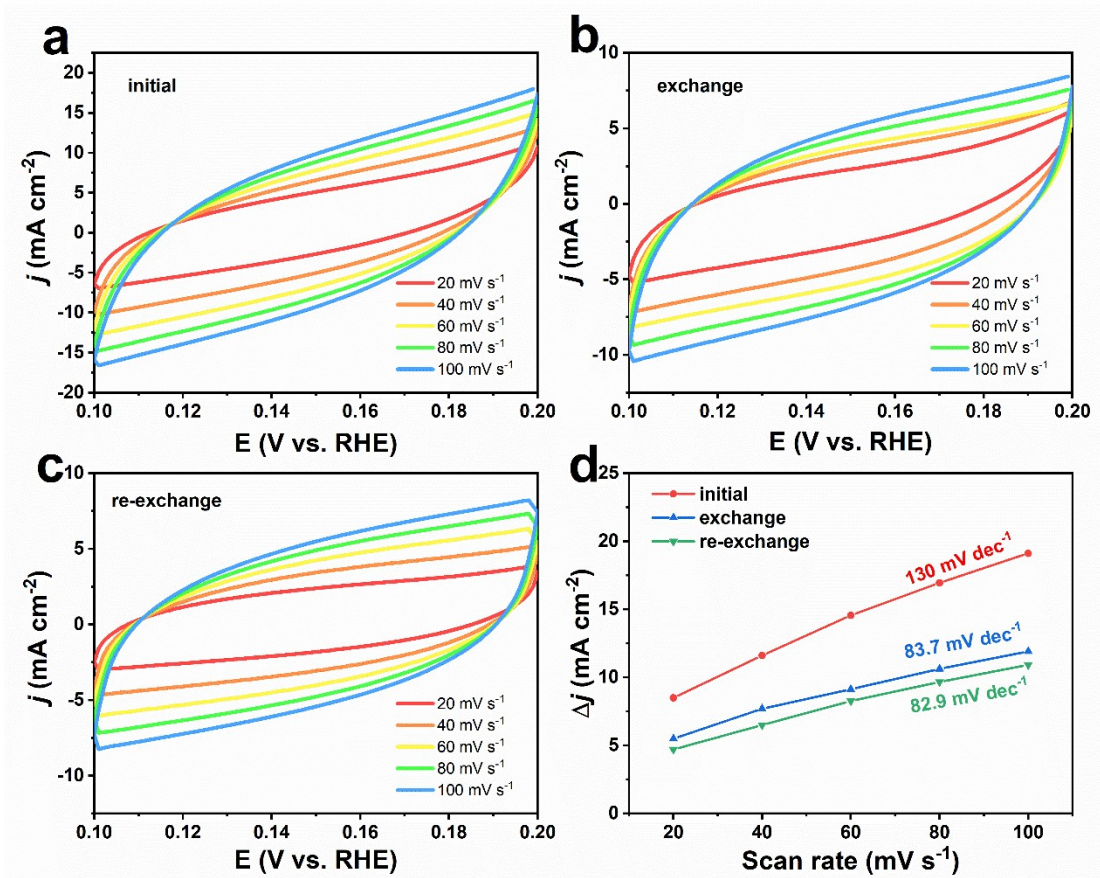

**Figure S13.** (a-c) CV curves of the initial anode, after exchange, and re-exchange; (d)

$C_{dl}$  values of the above samples (test voltage range is 0.1-0.2 vs RHE).

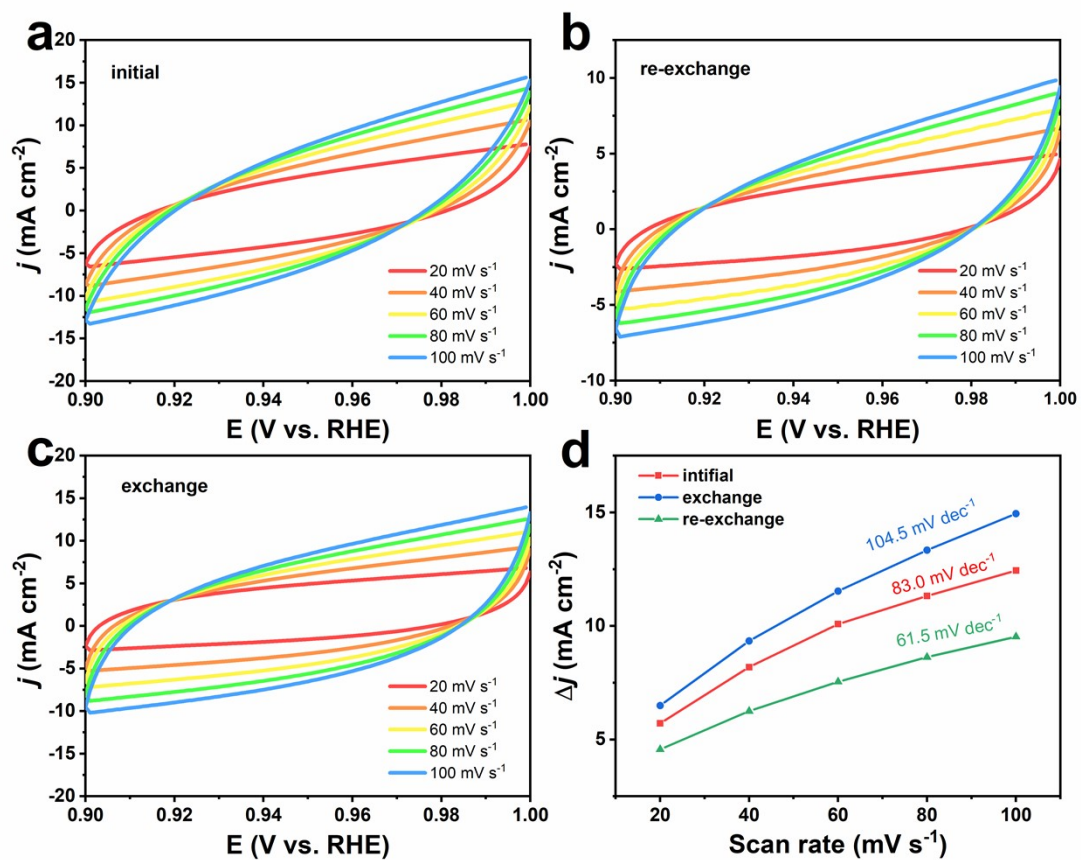

**Figure S14.** (a-c) CV curves of the initial anode, after exchange, and re-exchange; (d)  $C_{dl}$  values of the above samples (test voltage range is 0.9-1.0 vs RHE).

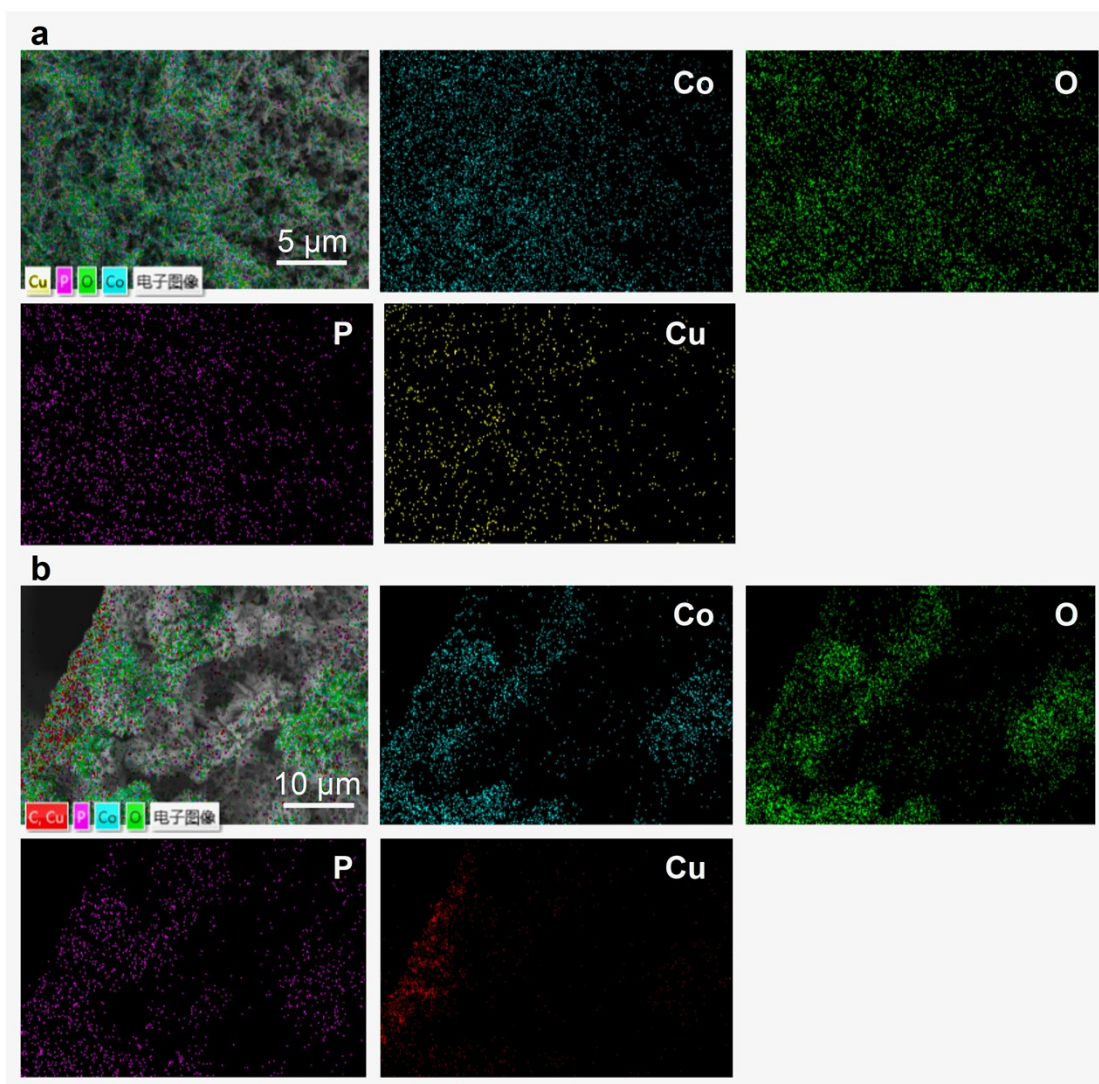

**Figure S15.** EDS mapping images of anode-side electrode: (a) after OER, (b) after HER of the exchanged sample.

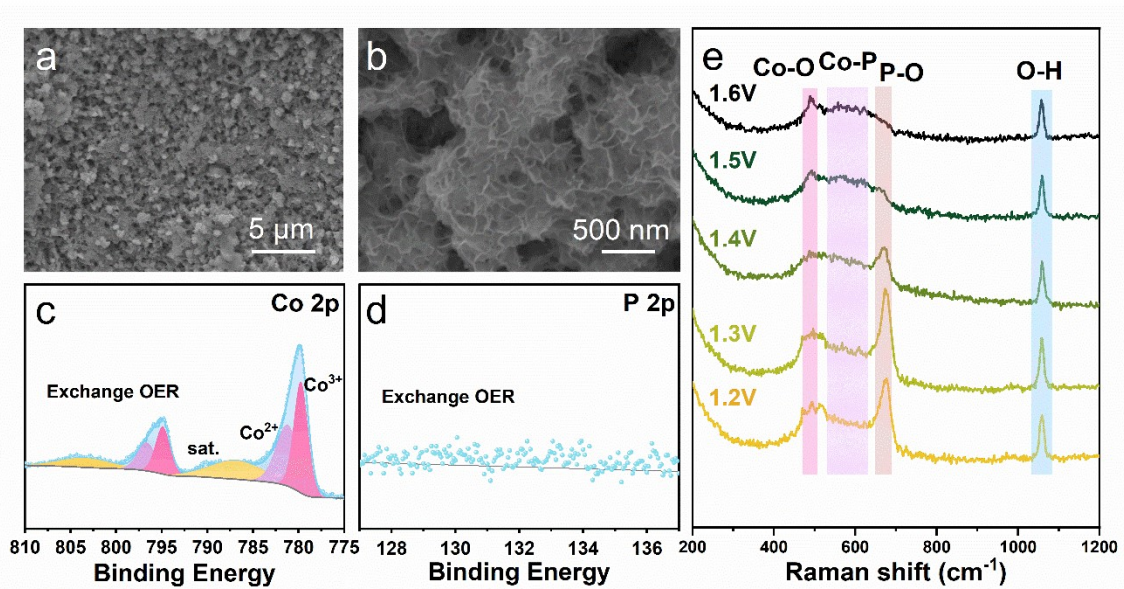

**Figure S16.** (a-b) SEM and (c-d) XPS maps of the exchanged samples after OER, (e) In-situ Raman diagram of the exchanged samples during OER process.



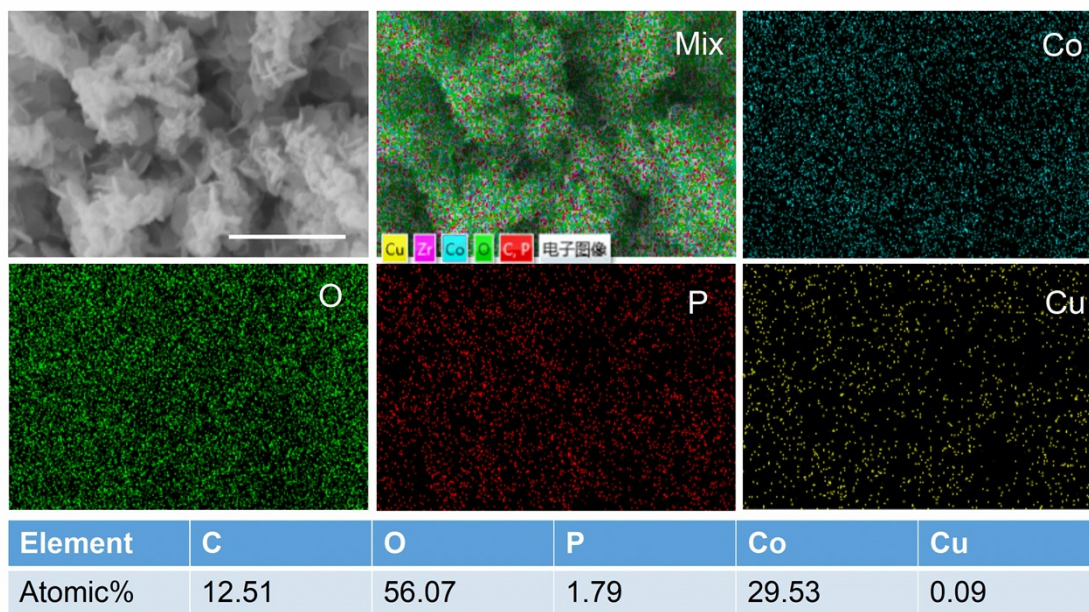

**Figure S17.** SEM and EDS mapping images of the exchanged sample after OER.

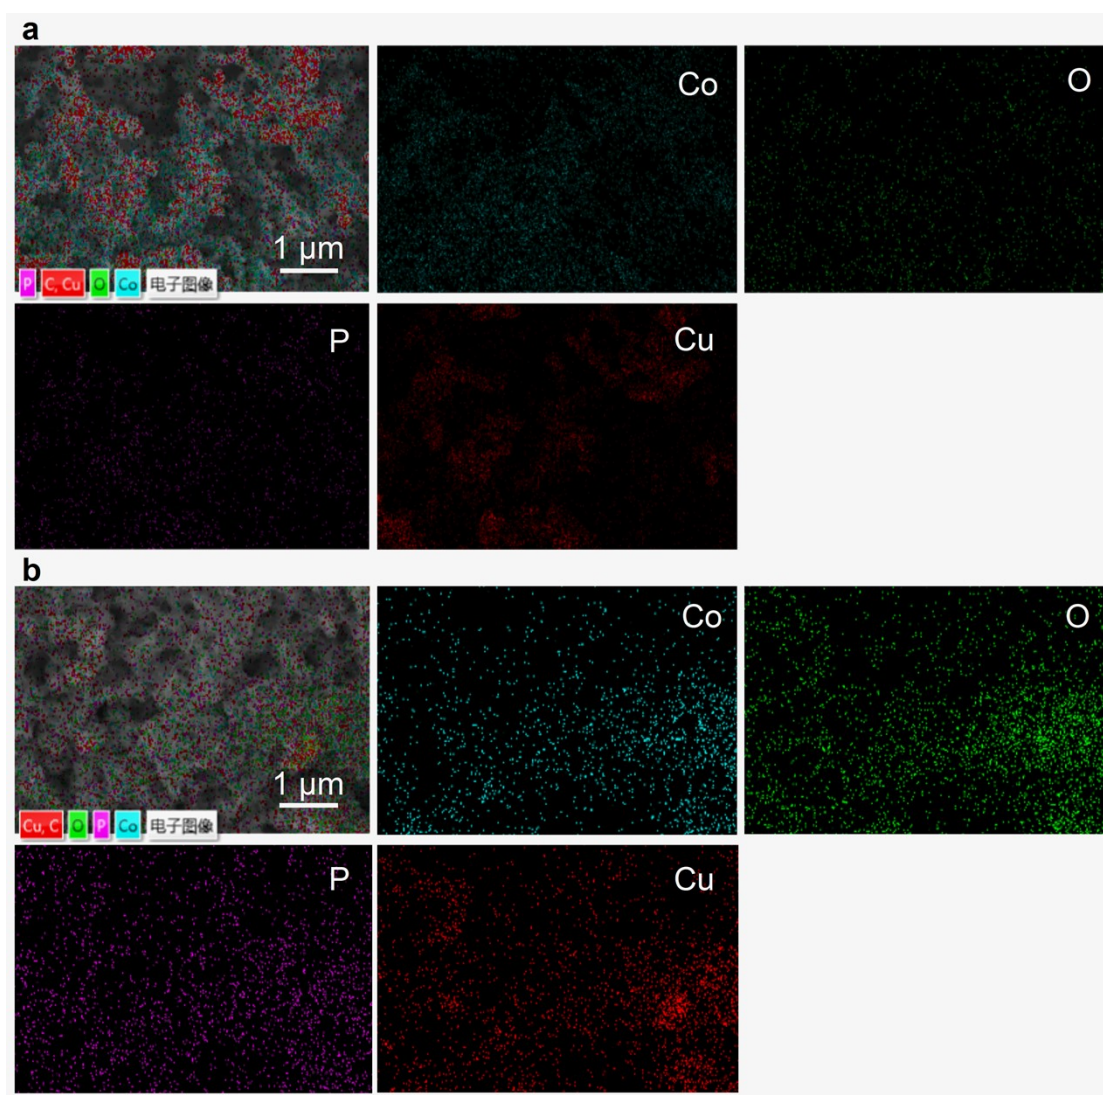

**Figure S18.** EDS mapping images of cathode-side electrode: (a) after HER, (b) after OER of the exchanged sample.



**Table S1** Comparison of different OER electrocatalysts recently reported

| Electrocatalyst                                                        | electrolyte | Overpotential<br>at<br>10 mA cm <sup>-2</sup><br>(mV) | Refs.     |
|------------------------------------------------------------------------|-------------|-------------------------------------------------------|-----------|
| NiCoP-NiS <sub>2</sub> /CMT                                            | 1M KOH      | 252                                                   | [1]       |
| CoP <sub>2</sub> /C                                                    | 1M KOH      | 310                                                   | [2]       |
| MnV <sub>2</sub> O <sub>6</sub> /graphene                              | 1M KOH      | 396                                                   | [3]       |
| FeP <sub>2</sub> -NiP <sub>2</sub> @PC                                 | 1M KOH      | 248                                                   | [4]       |
| Co <sub>3</sub> O <sub>4</sub> -CNTs                                   | 1M KOH      | 370                                                   | [5]       |
| FeS <sub>2</sub> CL@WS <sub>2</sub> NS                                 | 1M KOH      | 280                                                   | [6]       |
| PdP <sub>2</sub> @CB                                                   | 1M KOH      | 270                                                   | [7]       |
| NiCoP@rGO                                                              | 1M KOH      | 340                                                   | [8]       |
| PdCo                                                                   | 1M KOH      | 310                                                   | [9]       |
| NiO-FeO@NiCoO                                                          | 1M KOH      | 280                                                   | [10]      |
| Fe-Ni <sub>3</sub> C-2%                                                | 1M KOH      | 275                                                   | [11]      |
| Co <sub>9</sub> S <sub>8</sub> @NiFe-LDH/NF                            | 1M KOH      | 287                                                   | [12]      |
| CeO <sub>2</sub> /C                                                    | 1M KOH      | 297                                                   | [13]      |
| NCT                                                                    | 1M KOH      | 331                                                   | [14]      |
| H <sub>2</sub> PO <sub>2</sub> <sup>-</sup> /FeNi-LDH-V <sub>2</sub> C | 1M KOH      | 250                                                   | [15]      |
| CoP <sub>2</sub> @Co(CO <sub>3</sub> ) <sub>0.5</sub> OH/Cu/NF         | 1M KOH      | 251                                                   | this work |

## Reference

- [1] Xue, Y. Wang, H. Zhang, X. Zhao, C. Yao, J. Yan, Q. Zhao, J. Zhu, K. Cao, D. Wang, G. Construction of tubular carbon matrix-supported NiCoP-NiS<sub>2</sub> nanowires with heterointerfaces for overall water splitting. *Colloid. Surface. A* **2023**, 656, 130516.
- [2] Dutta, A. Samantara, A. K. Dutta, S. K. Jena, B. K. Pradhan, N. Surface-oxidized dicobalt phosphide nanoneedles as a nonprecious, durable, and efficient OER catalyst. *ACS Energy Lett.* **2016**, 1, 169-174.

- [3] Kim, K. H. Choi, Y. H. Hong, S. H. A  $\text{MnV}_2\text{O}_6$ /graphene nanocomposite as an efficient electrocatalyst for the oxygen evolution reaction. *Nanoscale* **2020**, 12, 16028-16033.
- [4] Ji, P. Jin, H. Xia, H. Luo, X. Zhu, J. Pu, Z. Mu, S. Double metal diphosphide pair nanocages coupled with P-doped carbon for accelerated oxygen and hydrogen evolution kinetics. *ACS appl. mater. interfaces* **2019**, 12, 727-733.
- [5] Shen, J. Gao, J. Ji, L. Chen, X. Wu, C. Three-dimensional interlinked  $\text{Co}_3\text{O}_4$ -CNTs hybrids as novel oxygen electrocatalyst. *Appl. Surf. Sci.* **2019**, 497, 143818.
- [6] Zhang, G. Hao, Z. Yin, J. Wang, C. Zhang, J. Zhao, Z. Wei, D. Zhou, H. Li, Z.  $\text{FeS}_2$  crystal lattice promotes the nanostructure and enhances the electrocatalytic performance of  $\text{WS}_2$  nanosheets for the oxygen evolution reaction. *Dalton T.* **2020**, 49, 9804-9810.
- [7] Luo, F. Zhang, Q. Yu, X. Xiao, S. Ling, Y. Hu, H. Guo, L. Yang, Z. Huang, L. Cai, W. Cheng, H. Palladium phosphide as a stable and efficient electrocatalyst for overall water splitting. *Angew. Chem. Int. Edit.* **2018**, 57, 14862-14867.
- [8] Mandal, J. R. Singh, K. Shahi, V. K. Amphoteric Membrane Loaded with a Noble Metal-Free Hollow Spherical  $\text{NiCoP}@ \text{rGO}$  Bifunctional Electrocatalyst for Alkaline Water Electrolyzers. *ACS Appl. Energy Mater.* **2022**, 5, 8611-8620.
- [9] Kaushik, P. Kaur, G. Chaudhary, G. R. Batra, U. Cleaner way for overall water splitting reaction by using palladium and cobalt based nanocomposites prepared from mixed metallosurfactants. *Appl. Surf. Sci.* **2021**, 556, 149769.
- [10] Yan, G. Li, G. Tan, H. Gu, Y. Li, Y. Spinel-type ternary multimetal hybrid oxides with porous hierarchical structure grown on Ni foam as large-current-density water oxidation electrocatalyst. *J. Alloy Compd.* **2020**, 838, 155662.
- [11] Fan, H. Yu, H. Zhang, Y. Zheng, Y. Luo, Y. Dai, Z. Li, B. Zong, Y. Yan, Q. Fe-doped  $\text{Ni}_3\text{C}$  nanodots in N-doped carbon nanosheets for efficient hydrogen-evolution and oxygen-evolution electrocatalysis. *Angew. Chem. Int. Edit.* **2017**, 56, 12566-12570.
- [12] Gao, X. T. Yu, Z. Zheng, K. X. Yin, J. M. Zheng, Y. Zhu, X. M. Dong, Y. W. Hollow  $\text{Co}_9\text{S}_8@ \text{NiFe-LDH}$  nanoarrays supported by nickel foam for boosting the

overall water-splitting performance. *Mater. Lett.* **2022**, 319, 132302.

[13] Nazar, N. Manzoor, S. ur Rehman, Y. Bibi, I. Tyagi, D. Chughtai, A. H. Gohar, R. S. Najam-Ul-Haq, M. Imran, M. A. Muhammad, N. Metal-organic framework derived CeO<sub>2</sub>/C nanorod arrays directly grown on nickel foam as a highly efficient electrocatalyst for OER. *Fuel* **2022**, 307, 121823.

[14] Ganesan, P. Sivanantham, A. Shanmugam, S. Nanostructured nickel–cobalt–titanium alloy grown on titanium substrate as efficient electrocatalyst for alkaline water electrolysis. *ACS Appl. Mater. Interfaces* **2017**, 9, 12416-12426.

[15] Chen, Y. Yao, H. Kong, F. Tian, H. Meng, G. Wang, S. Mao, X. Cui, X. Hou, X. Shi, J. V<sub>2</sub>C MXene synergistically coupling FeNi LDH nanosheets for boosting oxygen evolution reaction. *Appl. Catal. B-Environ.* **2021**, 297, 120474.

**Table S2** Comparison of different electrocatalysts recently reported for overall water splitting

| Electrocatalyst                                                                                                               | electrolyte | Cell voltage                   | Refs.     |
|-------------------------------------------------------------------------------------------------------------------------------|-------------|--------------------------------|-----------|
| NiCoP-NiS <sub>2</sub> /CMT NiCoP-NiS <sub>2</sub> /CMT                                                                       | 1M KOH      | 1.62V, 20 mA cm <sup>-2</sup>  | [1]       |
| NiCo <sub>2</sub> O <sub>4</sub>   NiCo <sub>2</sub> O <sub>4</sub>                                                           | 1M KOH      | 1.74V, 20 mA cm <sup>-2</sup>  | [2]       |
| Ni <sub>3</sub> S <sub>2</sub> /Ni(OH) <sub>2</sub> -NF Ni <sub>3</sub> S <sub>2</sub> /Ni(OH) <sub>2</sub> -NF               | 1M KOH      | 1.58V, 20 mA cm <sup>-2</sup>  | [3]       |
| NiCo <sub>2</sub> -N/TiN NiCo <sub>2</sub> -N/TiN                                                                             | 1M KOH      | 1.71V, 20 mA cm <sup>-2</sup>  | [4]       |
| PBSC@FeOOH-20 PBSC@FeOOH-20                                                                                                   | 1M KOH      | 1.638V, 10 mA cm <sup>-2</sup> | [5]       |
| NiFe-Se/Cl NiFe-Se/C                                                                                                          | 1M KOH      | 1.68V, 10 mA cm <sup>-2</sup>  | [6]       |
| NiFe <sub>2</sub> O <sub>4</sub> @N/rGO NiFe <sub>2</sub> O <sub>4</sub> @N/rGO                                               | 1M KOH      | 1.67V, 20 mA cm <sup>-2</sup>  | [7]       |
| CoP <sub>2</sub> @Co(CO <sub>3</sub> ) <sub>0.5</sub> OH/Cu/NF CoP <sub>2</sub> @Co(CO <sub>3</sub> ) <sub>0.5</sub> OH/Cu/NF | 1M KOH      | 1.56V, 20 mA cm <sup>-2</sup>  | [8]       |
| CoP/FeP/CP CoP/FeP/CP                                                                                                         | 1M KOH      | 1.62V, 10 mA cm <sup>-2</sup>  | [9]       |
| Pt/Ni <sub>3</sub> Fe/rGO Pt/Ni <sub>3</sub> Fe/rGO                                                                           | 1M KOH      | 1.55V, 10 mA cm <sup>-2</sup>  | [10]      |
| Pt-NiMoO <sub>4</sub> -GO/NF Pt-NiMoO <sub>4</sub> -GO/NF                                                                     | 1M KOH      | 1.568V, 10 mA cm <sup>-2</sup> | this work |

## Reference

- [1] Xue, Y. Wang, H. Zhang, X. Zhao, C. Yao, J. Yan, Q. Zhao, J. Zhu, K. Cao, D. Wang, G. Construction of tubular carbon matrix-supported NiCoP-NiS<sub>2</sub> nanowires with heterointerfaces for overall water splitting. *Colloid. Surface. A* **2023**, 656, 130516.
- [2] Gao, X. Zhang, H. Li, Q. Yu, X. Hong, Z. Zhang, X. Liang, C. Lin, Z. Hierarchical NiCo<sub>2</sub>O<sub>4</sub> hollow microcuboids as bifunctional electrocatalysts for overall water-splitting. *Angew. Chem. Int. Edit.* **2016**, 55, 6290-6294.
- [3] Wang, H. Wang, C. Zhang, W. Yao, S. A nano-spherical structure Ni<sub>3</sub>S<sub>2</sub>/Ni(OH)<sub>2</sub> electrocatalyst prepared by one-step fast electrodeposition for efficient and durable water splitting. *Int. J. Hydrogen Energ.* **2022**, 47, 14916-14929.

- [4] Tan, C. Wang, F. Lv, K. Shi, Y. Dong, B. Hao, L. Yin, L. Xu, X. Xian, Y. Agathopoulos, S. TiN ceramic membrane supported nitrogen-incorporating NiCo<sub>2</sub> nanowires as bifunctional electrode for overall water splitting in alkaline solution. *Sep. Purif. Technol.* **2022**, 298, 121582.
- [5] Zhang, Z. He, B. Chen, L. Wang, H. Wang, R. Zhao, L. Gong, Y. Boosting overall water splitting via FeOOH nanoflake-decorated PrBa<sub>0.5</sub>Sr<sub>0.5</sub>Co<sub>2</sub>O<sub>5+δ</sub> nanorods. *ACS Appl. Mater. Interfaces* **2018**, 10, 38032-38041.
- [6] Xu, B. Yang, H. Yuan, L. Sun, Y. Chen, Z. Li, C. Direct selenylation of mixed Ni/Fe metal-organic frameworks to NiFe-Se/C nanorods for overall water splitting. *J. Power Sources* **2017**, 366, 193-199.
- [7] Cao, L. Li, Z. Su, K. Zhang, M. Cheng, B. Rational design of hollow oxygen deficiency-enriched NiFe<sub>2</sub>O<sub>4</sub>@N/rGO as bifunctional electrocatalysts for overall water splitting. *J. Energy Chem.* **2021**, 54, 595-603.
- [8] Zeng L, An L, Zhang Z, et al. Heterogeneous strategy constructing a built-in electric field: CoP/FeP bifunctional electrode for overall water splitting. *Chem Eng J*, **2024**, 491: 152084.
- [9] Ni Y, Zhang W, Li Y, et al. Ultralow-content Pt nanodots/Ni<sub>3</sub>Fe nanoparticles: interlayer nanoconfinement synthesis and overall water splitting. *Nanoscale*, **2024**, 16(15): 7626-7633.
- [10] Deng X, Chen J, Zhang C, et al. Pt modified NiMoO<sub>4</sub>-GO/NF nanorods with strong metal-support interaction as efficient bifunctional catalysts for overall water splitting. *J. Colloid Interf. Sci.*, **2023**, 640: 928-939.
